# Supplementary material
Source: PubMed Central journal article supplement (PMC4642245)
Supplement: pr5b00653_si_001.pdf [file pr5b00653_si_001.pdf]

## **Pulsed Azidohomoalanine Labeling in Mammals (PALM) detects changes in Liver-specific LKB1 knockout mice**

Daniel B. McClatchy<sup>1</sup>, Yuanhui Ma<sup>1</sup>, Chao Liu<sup>2</sup>, Benjamin D. Stein<sup>1</sup>, Salvador Martínez-Bartolomé<sup>1</sup>, Debbie Vasquez<sup>3</sup>, Kristina Hellberg<sup>3</sup>, Reuben J. Shaw<sup>3,4</sup>, and John R. Yates III<sup>1\*</sup>

<sup>1</sup> Department of Chemical Physiology and Molecular and Cellular Molecular Biology, The Scripps Research Institute, La Jolla, CA 92037

<sup>2</sup>Key Lab of Intelligent Information Processing, Institute of Computing Technology, Chinese Academy of Sciences, Beijing 100190, China

<sup>3</sup>Molecular and Cell Biology Laboratory, <sup>4</sup>Howard Hughes Medical Institute, The Salk Institute for Biological Studies, La Jolla, CA 92037

\* Corresponding author: [jyates@scripps.edu](mailto:jyates@scripps.edu)

### Table of Contents:

**Table S-1:** List of the amino acids (g/kg) in the standard, PALM, and control diets

**Figure S-1.** Verification of removal of LKB1 from mouse livers.

**Figure S-2.** Correlation of other technical replicates of quantitated peptides from NSP not shown in Figure 4B.

All proteins identified and quantified are deposited at <http://sealion.scripps.edu/pint/?project=f302f024b4d5aa1f>, where the data can be queried and is linked to additional protein information. The data is organized by experiments and figures outline in the main text.

| Amino Acids (g/kg) | DIET     |       |         |
|--------------------|----------|-------|---------|
|                    | Standard | PALM  | Control |
| AHA                | 0        | 2     | 0       |
| Alanine            | 3.5      | 9.23  | 9.23    |
| Arginine           | 12.1     | 3.7   | 3.7     |
| Asparagine         | 6        | 10.25 | 10.25   |
| Aspartic Acid      | 3.5      | 12.06 | 12.06   |
| Cystine            | 3.5      | 3     | 3       |
| Glutamic Acid      | 40       | 49.45 | 49.45   |
| Glycine            | 23.3     | 28.12 | 28.12   |
| Histidine          | 4.5      | 3.5   | 3.5     |
| Isoleucine         | 8.2      | 4.25  | 4.25    |
| Leucine            | 11.1     | 7.5   | 7.5     |
| Lysine             | 18       | 5.5   | 5.5     |
| Methionine         | 8.2      | 0     | 2       |
| Phenylalanine      | 7.5      | 7.5   | 7.5     |
| Proline            | 3.5      | 3.5   | 3.5     |
| Serine             | 3.5      | 12.32 | 12.32   |
| Threonine          | 8.2      | 4.25  | 4.25    |
| Tryptophan         | 1.8      | 1.25  | 1.25    |
| Tyrosine           | 5        | 5     | 5       |
| Valine             | 8.2      | 5.5   | 5.5     |

**Table S-1:** List of the amino acids (g/kg) in the standard, PALM, and control diets

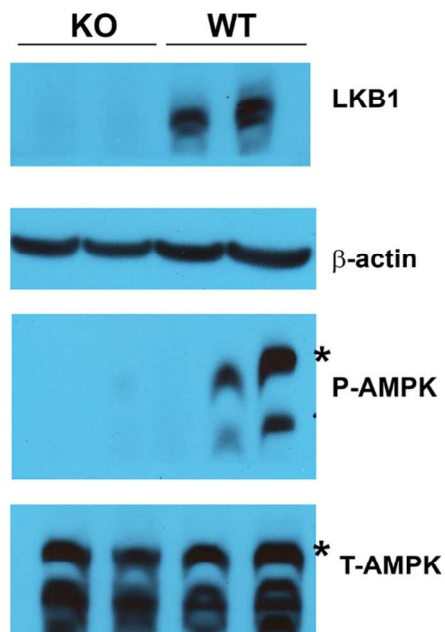

**Supplementary Figure 1**

**Figure S-1.** Verification of removal of LKB1 from mouse livers. The same mouse livers that were analyzed by PALM analysis were prepared for immunoblot analysis. LKB1 was detected in the WT livers but not the KO livers. Upon deletion of LKB1, loss of AMPK(P-AMPK) phosphorylation on Thr172 was observed as previously reported<sup>12</sup>. Total AMPK(T-AMPK) and beta-actin were employed as loading controls. The asterisk denotes the full-length protein.

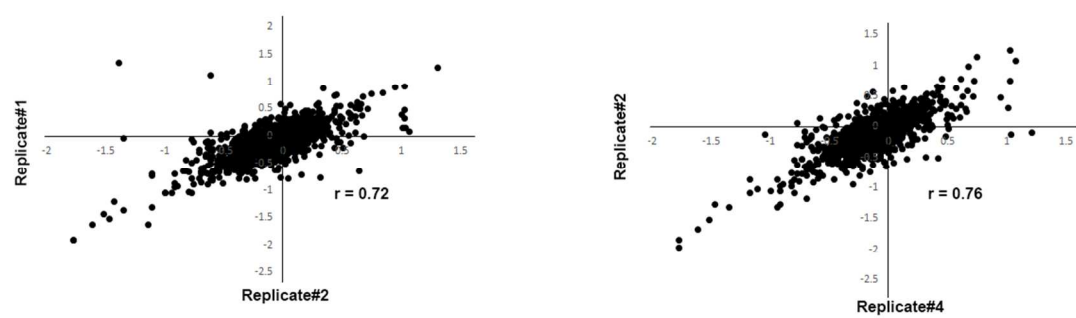

**Supplementary Figure 2**

**Figure S-2.** Correlation of other technical replicates of quantitated peptides from NSP not shown in Figure 4B.
